# Supplementary material for: Associations of Three Well-Characterized Polymorphisms in the IL-6 and IL-10 Genes with Pneumonia: A Meta-Analysis
Source: PubMed Central journal article supplement (PMC4338428; doi:10.1038/srep08559), 2015-02-24
Supplement: srep08559-s1.pdf [file srep08559-s1.pdf]

**Association of three Well-Characterized Polymorphisms in *IL -6* and  
*IL -10* Genes with Pneumonia: A Meta-Analysis**

Hong Chen<sup>1\*</sup>, Ning Li<sup>1\*</sup>, Huanying Wan<sup>1</sup>, Qijian Cheng<sup>2</sup>, Guochao Shi<sup>1</sup>, Yun Feng<sup>1</sup>  
<sup>1</sup>Department of Respiration, Ruijin Hospital, School of Medicine, Shanghai Jiao Tong University, Shanghai, China

<sup>2</sup>Department of Respiration, Ruijin North Hospital, School of Medicine, Shanghai Jiaotong University, Shanghai, China

\* These authors contributed equally to this work.

Correspondence and requests for materials should be addressed to G.C.S.( [shiguochao@hotmail.com](mailto:shiguochao@hotmail.com)) or Y.F.([fy01057@163.com](mailto:fy01057@163.com)) or Q.J.C ([chengqijian@yahoo.cn](mailto:chengqijian@yahoo.cn))

**Supplementary Table S1.** Criteria for quality assessment of genetic associations of the *IL-6* gene C-174G polymorphism with pneumonia risk

| <b>Criteria</b>                                                                                                                 | <b>Quality score</b> |
|---------------------------------------------------------------------------------------------------------------------------------|----------------------|
| <b><i>Representativeness of cases</i></b>                                                                                       |                      |
| A. Consecutive/randomly selected from case population with clearly defined random frame                                         | 2                    |
| B. Consecutive/randomly selected from case population without clearly defined random frame or with extensive inclusion criteria | 1                    |
| C. Method of selection not described                                                                                            | 0                    |
| <b><i>Representativeness of controls</i></b>                                                                                    |                      |
| D. Controls were consecutive/randomly drawn from the same area (ward/community) as cases with the same criteria                 | 2                    |
| E. Controls were consecutive/randomly drawn from a different area than cases                                                    | 1                    |
| F. Not described                                                                                                                | 0                    |
| <b><i>Ascertainment of pneumonia cases</i></b>                                                                                  |                      |
| G. Clearly described objective criteria for diagnosis of pneumonia                                                              | 1                    |
| H. Not described                                                                                                                | 0                    |
| <b><i>Ascertainment of controls</i></b>                                                                                         |                      |
| I. Clinical examinations were performed on controls to prove that controls did not have pneumonia                               | 2                    |
| J. Article merely stated that controls were subjects who did not have pneumonia; no proof provided                              | 1                    |
| K. Not described                                                                                                                | 0                    |
| <b><i>Ascertainment of genotyping examination</i></b>                                                                           |                      |
| L. Genotyping done under "blind" conditions                                                                                     | 1                    |

|                                                                                                                  |   |
|------------------------------------------------------------------------------------------------------------------|---|
| M. Unblended or not mentioned                                                                                    | 0 |
| <hr/>                                                                                                            |   |
| <b><i>Test for Hardy-Weinberg equilibrium</i></b>                                                                |   |
| N. Hardy-Weinberg equilibrium in control group                                                                   | 2 |
| O. Hardy-Weinberg disequilibrium in control group                                                                | 1 |
| P. Hardy-Weinberg equilibrium not checked                                                                        | 0 |
| <hr/>                                                                                                            |   |
| <b><i>Association assessment</i></b>                                                                             |   |
| Q. Assessed association between genotypes and pneumonia with appropriate statistic and adjusting confounders     | 2 |
| R. Assessed association between genotypes and pneumonia with appropriate statistic without adjusting confounders | 1 |
| S. Inappropriate statistic used                                                                                  | 0 |
| <hr/>                                                                                                            |   |

**Supplementary Table S2.** Excluded studies of IL-6, IL-10 gene polymorphisms and pneumonia risk.

| exclusion criteria   | Number | Titles of Excluded studies                                                                                                                                                                                                                                                                                                                                                                                                                                                                                                                                                                                                                                                                                                                                                                                                                                                                                               |
|----------------------|--------|--------------------------------------------------------------------------------------------------------------------------------------------------------------------------------------------------------------------------------------------------------------------------------------------------------------------------------------------------------------------------------------------------------------------------------------------------------------------------------------------------------------------------------------------------------------------------------------------------------------------------------------------------------------------------------------------------------------------------------------------------------------------------------------------------------------------------------------------------------------------------------------------------------------------------|
| based on title       | 8      | <p>Relationship between cytokine gene polymorphisms and risk of postoperative pneumonia with esophageal cancer.</p> <p>Sex and inflammation in respiratory diseases: a clinical viewpoint.</p> <p>Human parainfluenza virus serotypes differ in their kinetics of replication and cytokine secretion in human tracheobronchial airway epithelium.</p> <p>Pulse methylprednisolone therapy in type 3 adenovirus pneumonia with hypercytokinemia.</p> <p>Cytokine gene polymorphisms moderate illness severity in infants with respiratory syncytial virus infection.</p> <p>A human origin type II strain of <i>Toxoplasma gondii</i> causing severe encephalitis in mice.</p> <p>Pulse methylprednisolone therapy in type 3 adenovirus pneumonia with hypercytokinemia.</p> <p>The NLRP3 inflammasome is differentially activated by pneumolysin variants and contributes to host defense in pneumococcal pneumonia.</p> |
| non English articles | 2      | <p>TNF-<math>\alpha</math>, IL-10, and eNOS gene polymorphisms in patients with influenza A/H1N1 complicated by pneumonia.</p> <p>Genetic markers of predisposition to infectious complications in neonatal infants with respiratory distress syndrome.</p>                                                                                                                                                                                                                                                                                                                                                                                                                                                                                                                                                                                                                                                              |
| based on abstract    | 5      | <p>Searching for an immunogenetic factor that will illuminate susceptibility to non-tuberculous mycobacterial disease.</p> <p>Genetics of community-acquired pneumonia.</p> <p>Gene polymorphism in intensive care patients. Is the course of disease predetermined?</p> <p>Genetic markers of predisposition to infectious complications in neonatal infants with respiratory distress syndrome.</p> <p>Interleukin-1 receptor antagonist intron 2 variable number of tandem repeats polymorphism and respiratory failure in children with community-acquired pneumonia.</p>                                                                                                                                                                                                                                                                                                                                            |

---

|                                |   |                                                                                                                                                                                                                                                                                                                                                                                                                                                                                                                                                                                                                                                                                                                                                                                                                                                                                                                                                                                                                                                                                             |
|--------------------------------|---|---------------------------------------------------------------------------------------------------------------------------------------------------------------------------------------------------------------------------------------------------------------------------------------------------------------------------------------------------------------------------------------------------------------------------------------------------------------------------------------------------------------------------------------------------------------------------------------------------------------------------------------------------------------------------------------------------------------------------------------------------------------------------------------------------------------------------------------------------------------------------------------------------------------------------------------------------------------------------------------------------------------------------------------------------------------------------------------------|
| reviews                        | 3 | <p>Systemic cytokine response in patients with community-acquired pneumonia.</p> <p>Importance of severity of illness assessment in management of lower respiratory infections.</p> <p>Genetics of sepsis and pneumonia.</p>                                                                                                                                                                                                                                                                                                                                                                                                                                                                                                                                                                                                                                                                                                                                                                                                                                                                |
| other interleukin polymorphism | 8 | <p>Genetic polymorphisms within tumor necrosis factor gene promoter region: a role for susceptibility to ventilator-associated pneumonia.</p> <p>Interferon-gamma 874A&gt;T genetic polymorphism is associated with infectious complications following surgery in patients with thoracic esophageal cancer.</p> <p>The -308G/A polymorphism of TNF-alpha influences immunological parameters in old subjects affected by infectious diseases.</p> <p>Alleles carried at positions -819 and -592 of the IL10 promoter affect transcription following stimulation of peripheral blood cells with Streptococcus pneumoniae.</p> <p>Stroke, IL-1ra, IL1RN, infection and outcome.</p> <p>Genetic polymorphisms within tumor necrosis factor gene promoter region: a role for susceptibility to ventilator-associated pneumonia.</p> <p>Interleukin-1 receptor antagonist gene polymorphism in patients with multidrug-resistant Acinetobacter baumannii-associated pneumonia.</p> <p>Haplotype of IL-8 -251T and 781C is associated with the susceptibility to respiratory syncytial virus.</p> |
| articles with only patients    | 3 | <p>Variants at the promoter of the interleukin-6 gene are associated with severity and outcome of pneumococcal community-acquired pneumonia.</p> <p>Association of IL-10 polymorphism with severity of illness in community acquired pneumonia.</p> <p>Interleukin-10 haplotype associated with increased mortality in critically ill patients with sepsis from pneumonia but not in patients with extrapulmonary sepsis.</p>                                                                                                                                                                                                                                                                                                                                                                                                                                                                                                                                                                                                                                                               |
| articles for duplicate search  | 1 | <p>Host genetic risk factors for community-acquired pneumonia.</p>                                                                                                                                                                                                                                                                                                                                                                                                                                                                                                                                                                                                                                                                                                                                                                                                                                                                                                                                                                                                                          |

---
